# Supplementary material for: Fibroblast Growth Factor 23 and Cardiovascular Risk in Diabetes Patients—Cardiologists Be Aware
Source: MDPI journal article supplement (doi:10.3390/metabo12060498), 2022-05-30
Supplement: s1 [file s1]

**Table S1.** Correlations between FGF23 and other variables

| Variable                        | Spearman's correlation coefficient |          |
|---------------------------------|------------------------------------|----------|
|                                 | <i>r</i>                           | <i>p</i> |
| Cr, mg/dL                       | -0.0577                            | 0.571    |
| eGFR, ml/min/1,73m <sup>2</sup> | -0.0196                            | 0.848    |
| HbA1c, %                        | -0.1456                            | 0.151    |
| TC, mg/dL                       | 0.0377                             | 0.711    |
| HDL-C, mg/dL                    | 0.1569                             | 0.121    |
| LDL-C, mg/dL                    | -0.0027                            | 0.979    |
| non-HDL-C, mg/dL                | -0.0241                            | 0.813    |
| TG, mg/dL                       | -0.0714                            | 0.483    |
| LVEF, %                         | 0.0873                             | 0.393    |
| LVESV, mL                       | -0.1514                            | 0.137    |
| LVEDV, mL                       | -0.1328                            | 0.193    |
| LVMI, g/m <sup>2</sup>          | -0.0842                            | 0.410    |
| LA volume, mL                   | -0.0624                            | 0.542    |
| LAVI, mL/m <sup>2</sup>         | 0.0011                             | 0.992    |
| TAPSE, mm                       | 0.0881                             | 0.388    |
| RVOT proximal diameter, mm      | -0.1511                            | 0.137    |
| IVSs, mm                        | 0.0127                             | 0.901    |
| IVSd, mm                        | 0.0369                             | 0.719    |

**Note:** Values are expressed as *r* (Spearman's correlation coefficient) and *p* values.

**Abbreviations:** FGF23, fibroblast growth factor 23; Cr, creatinine; eGFR, estimated glomerular filtration rate; HbA1c, hemoglobin A1c; TC, total cholesterol; HDL-C, high-density lipoprotein cholesterol; LDL-C, low-density lipoprotein cholesterol; TG, triglycerides; LVEF, left ventricular ejection fraction; LVESV, left ventricular end systolic volume; LVEDV, left ventricular end diastolic volume; LVMI, left ventricular mass index; LA, left atrium; LAVI, left atrial volume index; TAPSE, tricuspid annular plane systolic excursion; RVOT, right ventricular outflow tract; IVSs, interventricular septum thickness at end-systole; IVSd, interventricular septum thickness at end-diastole.

**Table S2.** Correlations between various variables and overt IHD.

| Variable                        | Spearman's correlation coefficient |          |
|---------------------------------|------------------------------------|----------|
|                                 | <i>r</i>                           | <i>p</i> |
| Cr, mg/dL                       | 0.3514                             | 0.000    |
| eGFR, ml/min/1,73m <sup>2</sup> | -0.2577                            | 0.010    |
| HbA1c, %                        | 0.1032                             | 0.309    |
| TC, mg/dL                       | -0.1348                            | 0.184    |
| HDL-C, mg/dL                    | -0.2260                            | 0.024    |
| LDL-C, mg/dL                    | -0.1018                            | 0.316    |
| non-HDL-C, mg/dL                | -0.553                             | 0.587    |
| TG, mg/dL                       | 0.1332                             | 0.189    |
| LVEF, %                         | -0.3078                            | 0.002    |
| LVESV, mL                       | 0.3006                             | 0.003    |
| LVEDV, mL                       | 0.3067                             | 0.002    |
| LVMI, g/m <sup>2</sup>          | 0.3221                             | 0.001    |
| LA volume, mL                   | 0.3227                             | 0.001    |
| LAVI, mL/m <sup>2</sup>         | 0.3053                             | 0.002    |
| TAPSE, mm                       | -0.2459                            | 0.015    |
| RVOT proximal diameter, mm      | 0.1245                             | 0.222    |
| IVSs, mm                        | 0.0680                             | 0.506    |
| IVSd, mm                        | 0.1706                             | 0.093    |

**Note:** Data are expressed as *r* (Spearman's correlation coefficient) and *p* values.

**Abbreviations:** IHD, ischemic heart disease; Cr, creatinine; eGFR, estimated glomerular filtration rate; HbA1c, hemoglobin A1c; TC, total cholesterol; HDL-C, high-density lipoprotein cholesterol; LDL-C, low-density lipoprotein cholesterol; TG, triglycerides; LVEF, left ventricular ejection fraction; LVESV, left ventricular end systolic volume; LVEDV, left ventricular end diastolic volume; LVMI, left ventricular mass index; LA, left atrium; LAVI, left atrial volume index; TAPSE, tricuspid annular plane systolic excursion; RVOT, right ventricular outflow tract; IVSs, interventricular septum thickness at end-systole; IVSd, interventricular septum thickness at end-diastole.
